# Supplementary material for: Notch1 Has an Important Role in β-Cell Mass Determination and Development of Diabetes
Source: PubMed Central journal article supplement — Diabetes Metab J. 2020 Feb 26;45(1):86–96. doi: 10.4093/dmj.2019.0160 (PMC7850870; doi:10.4093/dmj.2019.0160), 2020-02-26
Supplement: dmj-2019-0160-s001.pdf [file dmj-2019-0160-s001.pdf]

**Supplementary Table 1.** Sequences of primers used in polymerase chain reaction analysis

| Name   | Forward primer (5' to 3') | Reverse primer (5' to 3') |
|--------|---------------------------|---------------------------|
| NAS-C  | GCTCCCATTCATCAGTTC        | TCTGTGAGAGTGAGCAGG        |
| NeuroD | CGCAGAAGGCAAGGTGTC'       | TTTGGTCATGTTTCCACTCC      |
| Pdx1   | GAAATCCACCAAAGCTCACG      | CGGGTTCGCTGTGTAAG         |
| Ngn3   | ACTGCTGCTTGTCACTGACTG     | ATGGTGAGCGCATCCAAG        |
| Ins1   | TATAAAGCTGGTGGGCATCC      | GGGACCACAAAAGATGCTGTT     |
| Maf-A  | CTCCAGAGCCAGGTGGAG        | GTACAGGTCCCCTCCTTG        |

NAS-C, Notch1 antisense construct; NeuroD, neurogenic differentiation; Pdx1, pancreatic and duodenal homeobox 1; Ngn3, neurogenin3; Ins1, insulin 1; Maf-A, MAF bZIP transcription factor A.
